# Supplementary material for: Proteomics and phosphoproteomics provide insights into the mechanism of action of a novel pyrazolo[3,4- d ]pyrimidine Src inhibitor in human osteosarcoma
Source: Royal Society of Chemistry journal article supplement (doi:10.1039/c3mb70328b), 2014-02-10
Supplement: c3mb70328b1.pdf [file c3mb70328b1.pdf]

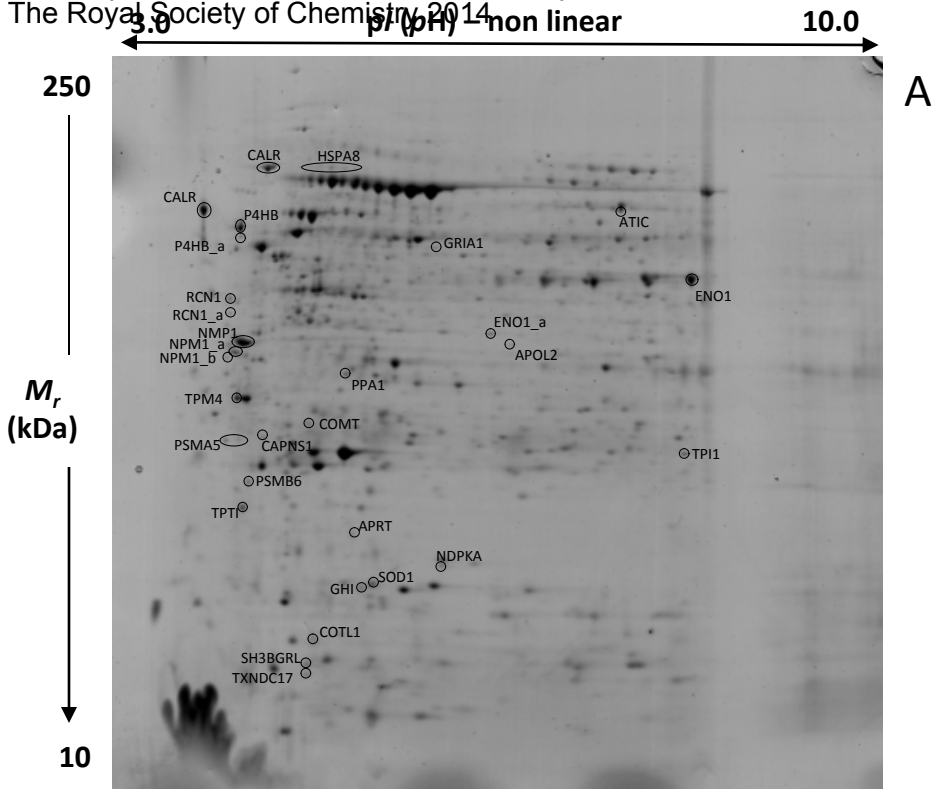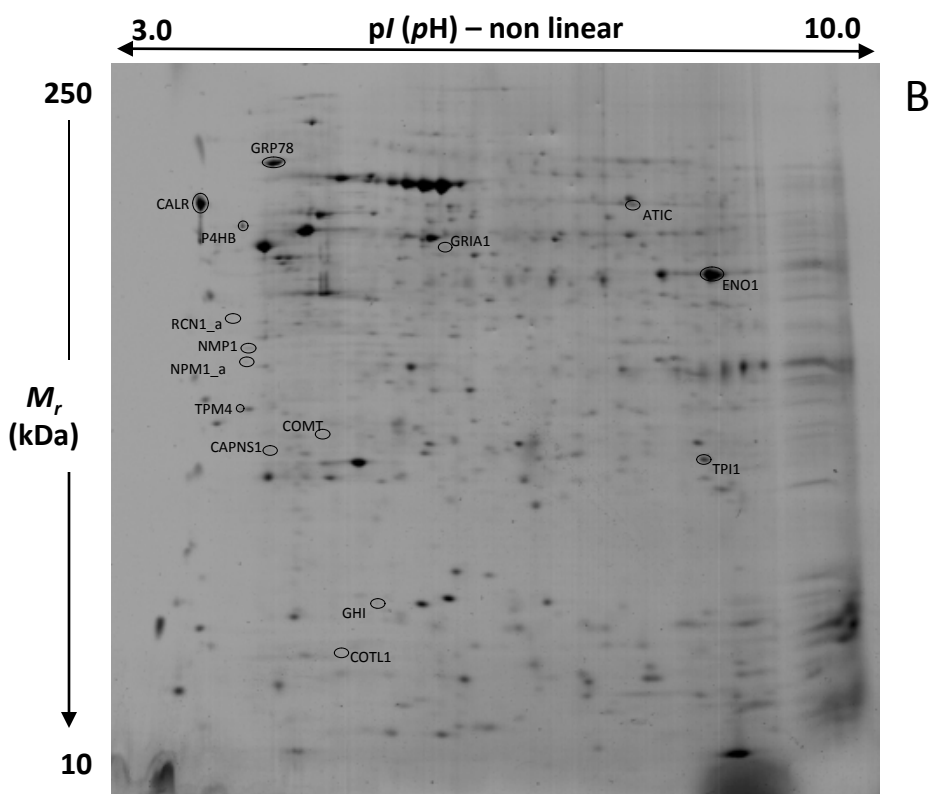

Figure 1 SM: pH 3.0-10.0 Coomassie stained two-dimensional gels. Proteomic maps of SaOS-2 cells under control conditions-DMSO (A) or treated with 25  $\mu$ M SI83 for 3 hours (B). Representative images from a triplicate set are shown. Proteins differentially expressed are circled and indicated by Swiss-Prot code.

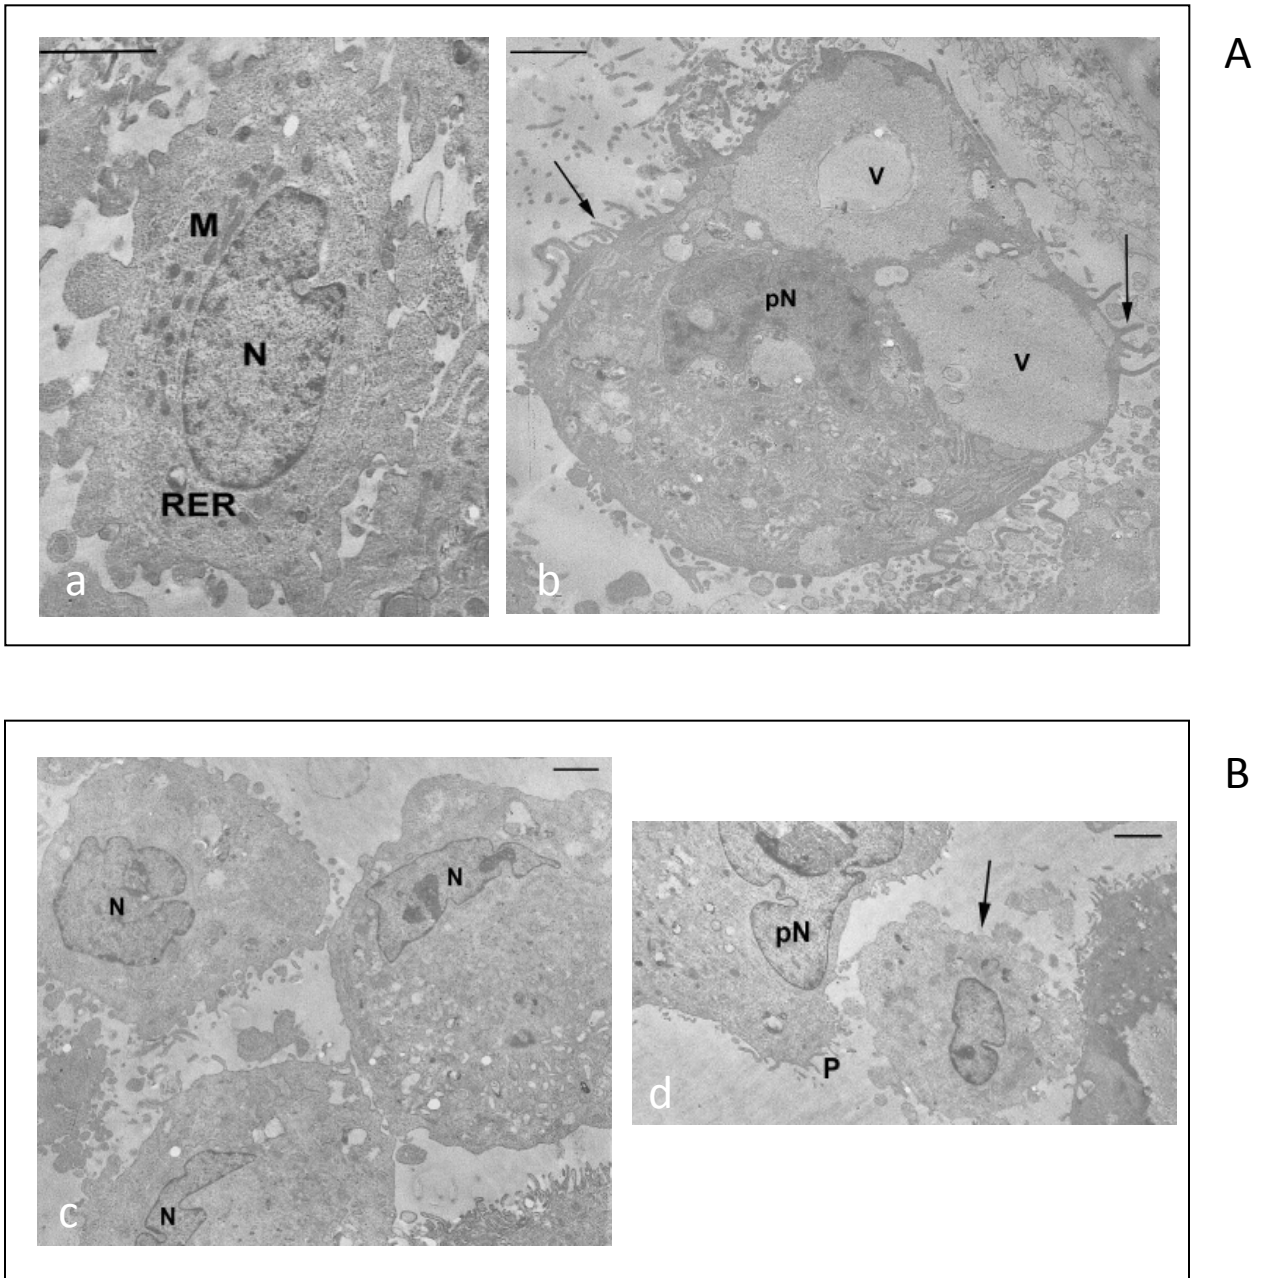

Figure 2 SM: TEM observation of SI-83-treated OS cells. SaOS-2 cells cultured in the presence of DMSO (A, control) or 25  $\mu$ M SI-83 for 3 hours (B). A) Control cells showed a good state of health: an euchromatic nucleus (N) and a cytoplasm abundant in endoplasmic rough reticulum (RER) and mitochondria (M). B) SI-83-treated cells showed evident signs of suffering: the nucleus became pyknotic (pN) and large vacuoles (V) were present in the cytoplasm. Plasma membrane presents numerous protrusions (arrows). Bar 3 $\mu$ m. TEM sections of osteoblasts cultured in presence of DMSO (C) or 25  $\mu$ M Si83 for 3 hours (D). In panel C, the cells highlight normal ultrastructure at nuclear and cytoplasmic level, nucleus (N). Panel D shows an osteoblast (arrow) with a good state of health and others cells with different signs of cellular suffering: pyknotic nucleus (pN), plasma membrane protrusions (P). Bar 3 $\mu$ m.

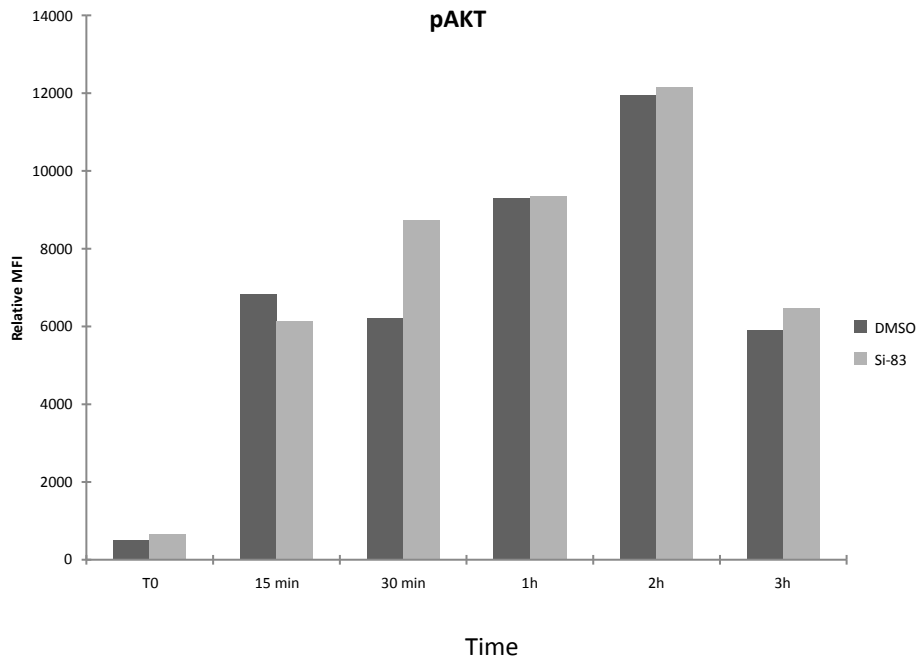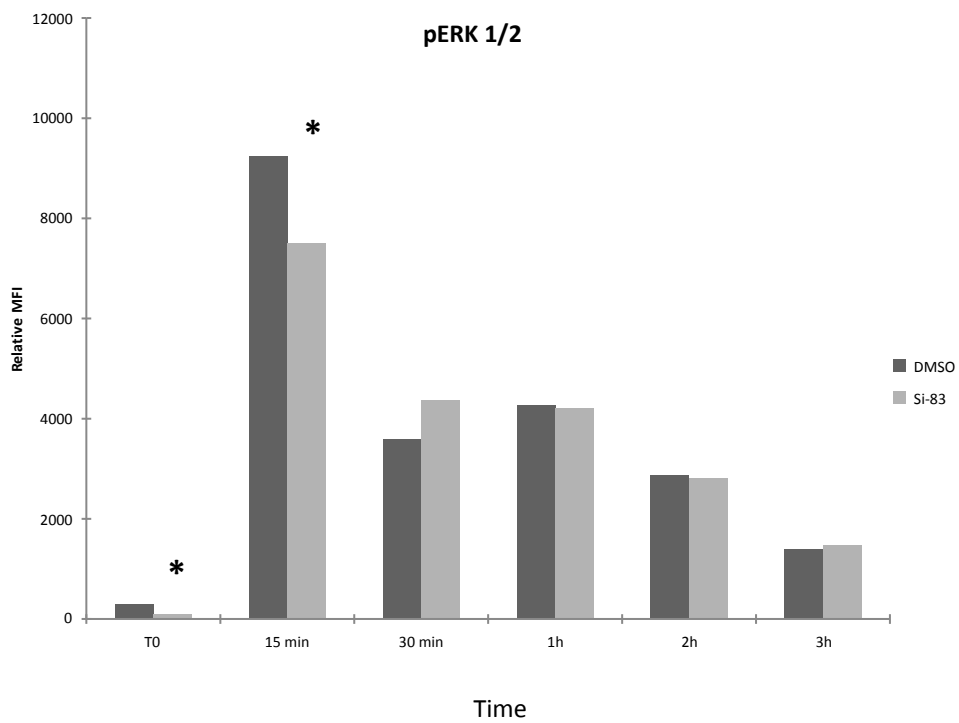

Figure 3-SM Quantification of phosphorylated AKT (pAKT) and phosphorylated ERK1/2 (pERK1/2). SaOS-2 cells were treated with SI-83 25  $\mu$ M for the indicated times. SI-83 did not affect the pAKT levels, while ERK 1/2 activation was transiently inhibited (time 0 and 15 minutes) Bars, SD. \*p<0.05.
