# Supplementary material for: Proteomics and phosphoproteomics provide insights into the mechanism of action of a novel pyrazolo[3,4- d ]pyrimidine Src inhibitor in human osteosarcoma
Source: Royal Society of Chemistry journal article supplement (doi:10.1039/c3mb70328b), 2014-02-10
Supplement: c3mb70328b2.pdf [file c3mb70328b2.pdf]

**Table 1SM: Comparative Proteomics of SI-83 treated SaOS-2 cell line.**

<sup>1</sup>AN: accession number, <sup>2</sup>protein biological processes, and <sup>3</sup>Loc: protein sub-cellular localization: C (cytosol); Cs (cytoskeleton); M (membrane); Mel (melanosome); ER (endoplasmic reticulum); N (nucleus); S (secreted). Retrieved by UniProt knowledgebase (<http://www.uniprot.org/>).

<sup>4</sup>Fold-change: according to SI-83 treated/DMSO control ratio. "a" indicates the absence of proteins in SI-83 treated sample.

<sup>5</sup>ID: Identification method (MS: MALDI-Tof peptide fingerprinting analysis; PSD: single peptide post-source decay analysis; GM: gel-matching analysis).

| Spot                                                        | Protein                                            | Gene Name      | AN <sup>1</sup> | Loc <sup>2</sup> | Biological processes <sup>3</sup>                                                                                                      | Fold-change <sup>4</sup> | ID <sup>5</sup> | Est'd Z | Peptides | Sequence coverage % | Theor. pI/M <sub>r</sub>   |
|-------------------------------------------------------------|----------------------------------------------------|----------------|-----------------|------------------|----------------------------------------------------------------------------------------------------------------------------------------|--------------------------|-----------------|---------|----------|---------------------|----------------------------|
| <b>Energy</b>                                               |                                                    |                |                 |                  |                                                                                                                                        |                          |                 |         |          |                     |                            |
| ENO1                                                        | Alpha-enolase                                      | <i>ENO1</i>    | P06733          | C                | Glycolytic enzyme                                                                                                                      | 3.38                     | MS/PSD          | 2.41    | 27       | 60                  | 6.99/47037                 |
| ENO1_a                                                      | Alpha-enolase                                      | <i>ENO1</i>    | P06733          | C                | Glycolytic enzyme, MPB1: tumour suppressor                                                                                             | a                        | MS/PSD          | 1.82    | 7        | 19                  | 6.99/47037<br>(5.93/36928) |
| TPI1                                                        | Triosephosphate isomerase                          | <i>TPI1</i>    | P60174          | C                | Gluconeogenesis, Glycolysis, Pentose shunt.                                                                                            | 3.28                     | MS/PSD          | 2.40    | 16       | 69                  | 6.45/26669                 |
| <b>Cell rescue, defence &amp; stress</b>                    |                                                    |                |                 |                  |                                                                                                                                        |                          |                 |         |          |                     |                            |
| SOD1                                                        | Superoxide dismutase [Cu-Zn]                       | <i>SOD1</i>    | P00441          | C                | Response to oxidative stress.                                                                                                          | a                        | MS/PSD          | 1.78    | 5        | 56                  | 5.70/15804                 |
| TXNDC17                                                     | Thioredoxin domain-containing protein 17           | <i>TXNDC17</i> | Q9BRA2          | C                | Disulfide reductase. Modulates TNF-alpha signaling and NF-kappa-B activation. response to oxidative stress.                            | a                        | MS/PSD          | 1.84    | 4        | 47                  | 5.38/13809                 |
| SH3BGRL                                                     | SH3 domain-binding glutamic acid-rich-like protein | <i>SH3BGRL</i> | O75368          | C, N             |                                                                                                                                        | a                        | MS/PSD          | 2.40    | 6        | 73                  | 5.22/12774                 |
| <b>Metabolism (nucleotide, nucleoside and nucleic acid)</b> |                                                    |                |                 |                  |                                                                                                                                        |                          |                 |         |          |                     |                            |
| ATIC                                                        | Bifunctional purine biosynthesis protein PURH      | <i>ATIC</i>    | P31939          | C                | De novo biosynthesis of purine nucleotide                                                                                              | 2.37                     | MS/PSD          | 1.94    | 6        | 15                  | 6.27/64615                 |
| APRT                                                        | Adenine phosphoribosyltransferase                  | <i>APRT</i>    | P07741          | C                | Biosynthesis of purine nucleotides, purine salvage                                                                                     | a                        | MS/PSD          | 1.70    | 6        | 50                  | 5.77/19476                 |
| NDPKA                                                       | Nucleoside diphosphate kinase A                    | <i>NDPKA</i>   | P15531          | C, N             | Nucleotide metabolism, cell differentiation, regulation of apoptosis                                                                   | a                        | MS/PSD          | 2.12    | 6        | 32                  | 5.82/17017                 |
| <b>Protein fate (folding, maturation, transport)</b>        |                                                    |                |                 |                  |                                                                                                                                        |                          |                 |         |          |                     |                            |
| APOL2                                                       | Apolipoprotein-L2                                  | <i>APOL2</i>   | Q9BQE5          | C                | Lipids transport                                                                                                                       | 2.11                     | MS/PSD          | 1.70    |          | 16                  | 6.28/37092                 |
| P4HB                                                        | Protein disulfide-isomerase                        | <i>P4HB</i>    | P07237          | ER, Mel          | Catalyzes the rearrangement of disulfide bonds.                                                                                        | 0.33                     | MS/PSD          | 2.40    | 8        | 17                  | 4.69/55294                 |
| P4HB_a                                                      | Protein disulfide-isomerase                        | <i>P4HB</i>    | P07237          | ER, Mel          | Catalyzes the of disulfide bonds.                                                                                                      | a                        | MS/PSD          | 2.15    | 21       | 41                  | 4.69/55294                 |
| NPM1                                                        | Nucleophosmin                                      | <i>NPM1</i>    | P06748          | N, C, Cs         | Ribosome biogenesis, protein chaperoning, histone assembly, cell proliferation.                                                        | 0.07                     | MS/PSD          | 1.75    | 8        | 24                  | 4.64/32575                 |
| NPM1_a                                                      | Nucleophosmin                                      | <i>NPM1</i>    | P06748          | N, C, Cs         | Ribosome biogenesis, protein chaperoning, histone assembly, cell proliferation.                                                        | 0.09                     | MS/PSD          | 1.72    | 6        | 20                  | 4.64/32575                 |
| NPM1_b                                                      | Nucleophosmin                                      | <i>NPM1</i>    | P06748          | N, C, Cs         | Ribosome biogenesis, protein chaperoning, histone assembly, cell proliferation.                                                        | a                        | MS/PSD          | 1.72    | 6        | 20                  | 4.64/32575                 |
| CAPNS1                                                      | Calpain small subunit 1                            | <i>CAPNS1</i>  | P04632          | C, M             | Regulatory subunit of the calcium-regulated non-lysosomal thiol-protease, involved in cytoskeletal remodeling and signal transduction. | 3.95                     | MS/PSD          | 1.70    | 5        | 19                  | 5.05/28315                 |

|                                        |                                           |              |        |             |                                                                                                                                                                                   |      |        |      |   |    |               |
|----------------------------------------|-------------------------------------------|--------------|--------|-------------|-----------------------------------------------------------------------------------------------------------------------------------------------------------------------------------|------|--------|------|---|----|---------------|
| <b>CALR</b>                            | Calreticulin                              | <b>CALR</b>  | P27797 | C, ER, M, S | Calcium-binding chaperone that promotes folding, oligomeric assembly and quality control in the endoplasmic reticulum (ER) via the calreticulin/calnexin cycle.                   | 2.5  | GM     |      |   |    | 4.29/48141.56 |
| GRP78                                  | 78 kDa glucose-regulated protein          | GRP78        | P11021 | C           | Plays a role in facilitating the assembly of multimeric protein complexes inside the ER.                                                                                          | 2.02 | GM     |      |   |    | 5.01/70478    |
| RCN1                                   | Reticulocalbin-1                          | <i>RCN1</i>  | Q15293 | ER          | Regulate calcium-dependent activities in ER, belongs to the CREC family.                                                                                                          | a    | MS/PSD | 1.73 | 7 | 25 | 4.68/35867    |
| RCN1_a                                 | Reticulocalbin-1                          | <i>RCN1</i>  | Q15293 | ER          | Regulate calcium-dependent activities in ER, belongs to the CREC family.                                                                                                          | 0.25 | MS/PSD | 1.70 | 5 | 16 | 4.68/35867    |
| HSPA8                                  | Heat shock cognate 71 kDa protein         | <i>HSPA8</i> | P11142 | C, Mel      | Repressor of transcriptional activation, chaperonin.                                                                                                                              | a    | MS/PSD | 1.70 | 8 | 22 | 5.37/70898    |
| <b>Proteasome complex</b>              |                                           |              |        |             |                                                                                                                                                                                   |      |        |      |   |    |               |
| PSMA5                                  | Proteasome subunit alpha type-5           | <i>PSMA5</i> | P28066 | C, N        | Proteolytic activity, cleavage of peptide bonds with very broad specificity.                                                                                                      | a    | MS/PSD | 1.74 | 5 | 26 | 4.74/26411    |
| PSMB6                                  | Proteasome subunit beta type-6            | <i>PSMB6</i> | P28072 | C, N        | Proteolytic activity, cleavage of peptide bonds with very broad specificity.                                                                                                      | a    | MS/PSD | 2.28 | 7 | 30 | 4.91/21904    |
| <b>Signal transduction</b>             |                                           |              |        |             |                                                                                                                                                                                   |      |        |      |   |    |               |
| TPT1                                   | Translationally-controlled tumour protein | <i>TPT1</i>  | P13693 | C           | Anti-apoptosis, calcium ion transport and homeostasis, microtubule stabilization                                                                                                  | a    | MS/PSD | 2.34 | 9 | 38 | 4.84/19595    |
| GRIA1                                  | Glutamate receptor 1                      | <i>GRIA1</i> | P42261 | M           | Ionotropic glutamate receptor. Belongs to the glutamate-gated ion channel family. GRIA1 subfamily.                                                                                | 3.98 | MS/PSD | 1.70 | 5 | 7  | 7.86/99578    |
| COMT                                   | Catechol O-methyltransferase              | <i>COMT</i>  | P21964 | C, M        | Inactivation of catecholamine neurotransmitters and catechol hormones.                                                                                                            | 0.37 | MS/PSD | 1.75 | 5 | 22 | 5.26/30037    |
| <b>Cellular organization</b>           |                                           |              |        |             |                                                                                                                                                                                   |      |        |      |   |    |               |
| <b>Cytoskeleton &amp; Microtubules</b> |                                           |              |        |             |                                                                                                                                                                                   |      |        |      |   |    |               |
| TPM4                                   | Tropomyosin alpha-4 chain                 | <i>TPM4</i>  | P67936 | C, Cs       | Muscle filament sliding, response to oxidative stress                                                                                                                             | 0.28 | MS/PSD | 2.25 | 9 | 38 | 4.67/28391    |
| COTL1                                  | Coactosin-like protein                    | <i>COTL1</i> | Q14019 | C, Cs       | Binding to F-actin in a calcium-independent manner.                                                                                                                               | 0.13 | MS/PSD | 1.75 | 5 | 25 | 5.51/15813    |
| <b>Cell Cycle</b>                      |                                           |              |        |             |                                                                                                                                                                                   |      |        |      |   |    |               |
| GH1                                    | Somatotropin                              | <i>GH1</i>   | P01241 | S           | Growth regulation. It stimulates both the differentiation and proliferation of myoblasts. It also stimulates amino acid uptake and protein synthesis in muscle and other tissues. | 0.39 | MS/PSD | 1.70 | 5 | 18 | 5.27/22129    |
